# Supplementary material for: A facile route for the synthesis of heterogeneous crystal structures in hierarchical architectures with vacancy-driven defects via the oriented attachment growth mechanism
Source: Royal Society of Chemistry journal article supplement (doi:10.1039/c8ta01027g), 2018-01-01
Supplement: c8ta01027g1.pdf [file c8ta01027g1.pdf]

## Electronic Supplementary Information (ESI)

### **A facile step for heterogeneous crystal structure in hierarchical architecture with vacancy-driven defects by oriented attachment growth mechanism**

Li Cheng Kao,<sup>a</sup> Yifan Ye,<sup>b</sup> Yi-Sheng Liu,<sup>b</sup> Chung Li Dong,<sup>c</sup> Jinghua Guo,<sup>\*bd</sup> and

Sofia Ya Hsuan Liou<sup>\*a</sup>

<sup>a</sup>Department of Geosciences, National Taiwan University, Taipei 106, Taiwan.

<sup>b</sup>Advanced Light Source, Lawrence Berkeley National Laboratory, CA 94720, USA.

<sup>c</sup>Department of Physics, Tamkang University, Tamsui District, New Taipei City 25137, Taiwan.

<sup>d</sup>Department of Chemistry and Biochemistry, University of California, Santa Cruz, CA 95064, USA.

E-mail: [jguo@lbl.gov](mailto:jguo@lbl.gov); [yhliou@ntu.edu.tw](mailto:yhliou@ntu.edu.tw)

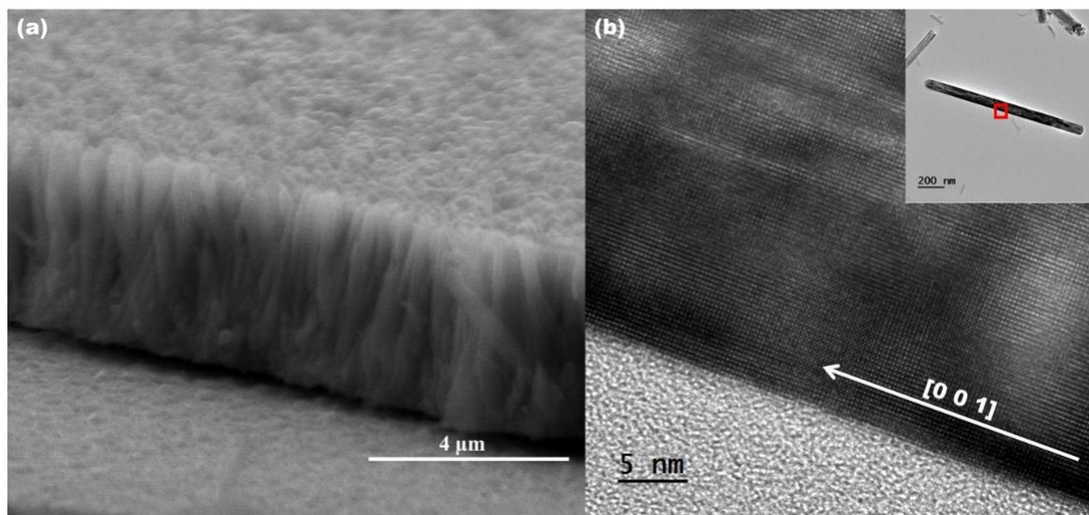

**Figure S1.** (a) The side view SEM images of TiO<sub>2</sub>\_R. (b) HRTEM images of tetragonal-rutile phase nanorod with a [0 0 1] growth direction taken from the inset red square.

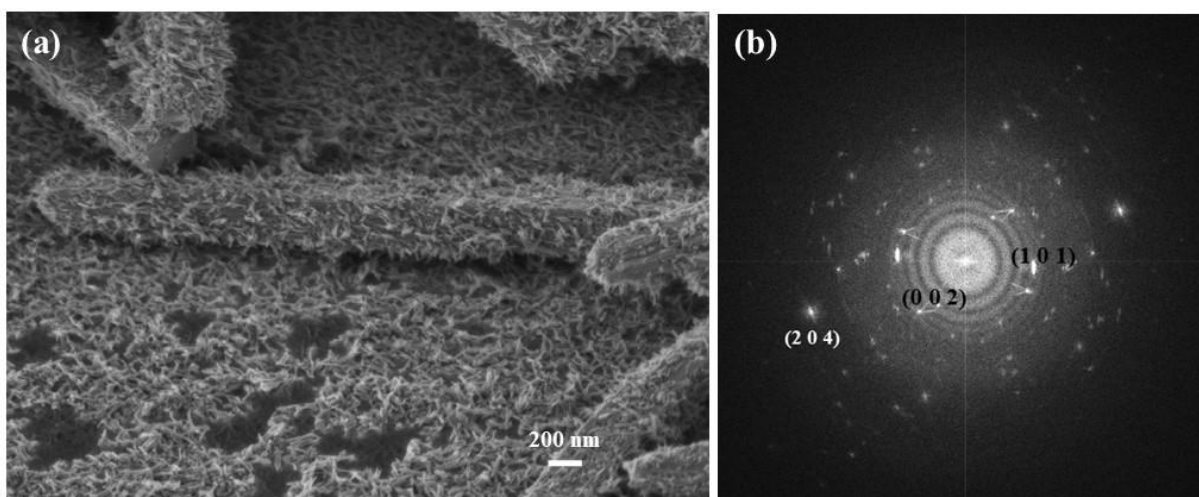

**Figure S2.** (a) FESEM images of HA\_TiO<sub>2</sub>\_M. (b) The corresponding fast Fourier transform pattern of Figure 1d reveals the rings contributed by multiple sub-nano structures can be indexed to anatase diffraction planes of (0 0 2) and (1 0 1).

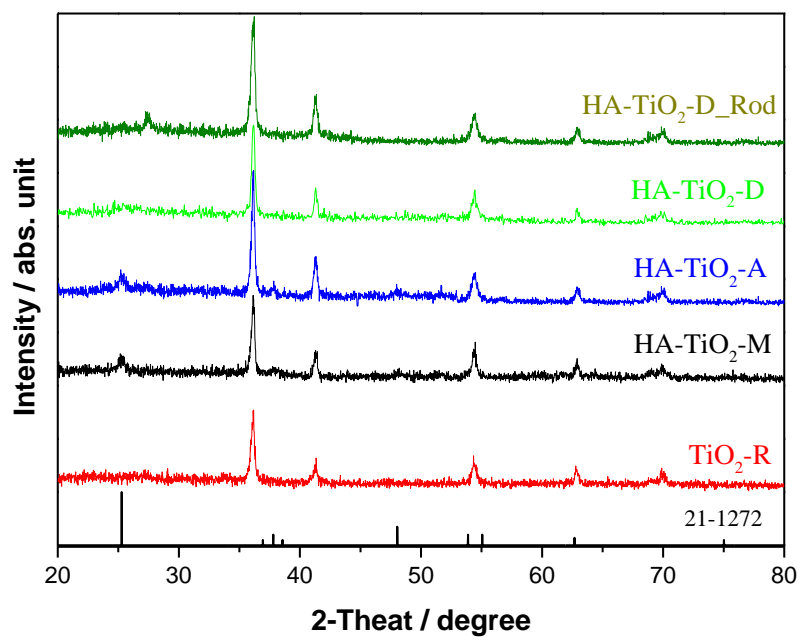

**Figure S3.** XRD pattern of rutile TiO<sub>2</sub> and HA\_TiO<sub>2</sub> series. The tetragonal anatase phase (JCPDS No. 21-1272) was listed as reference.

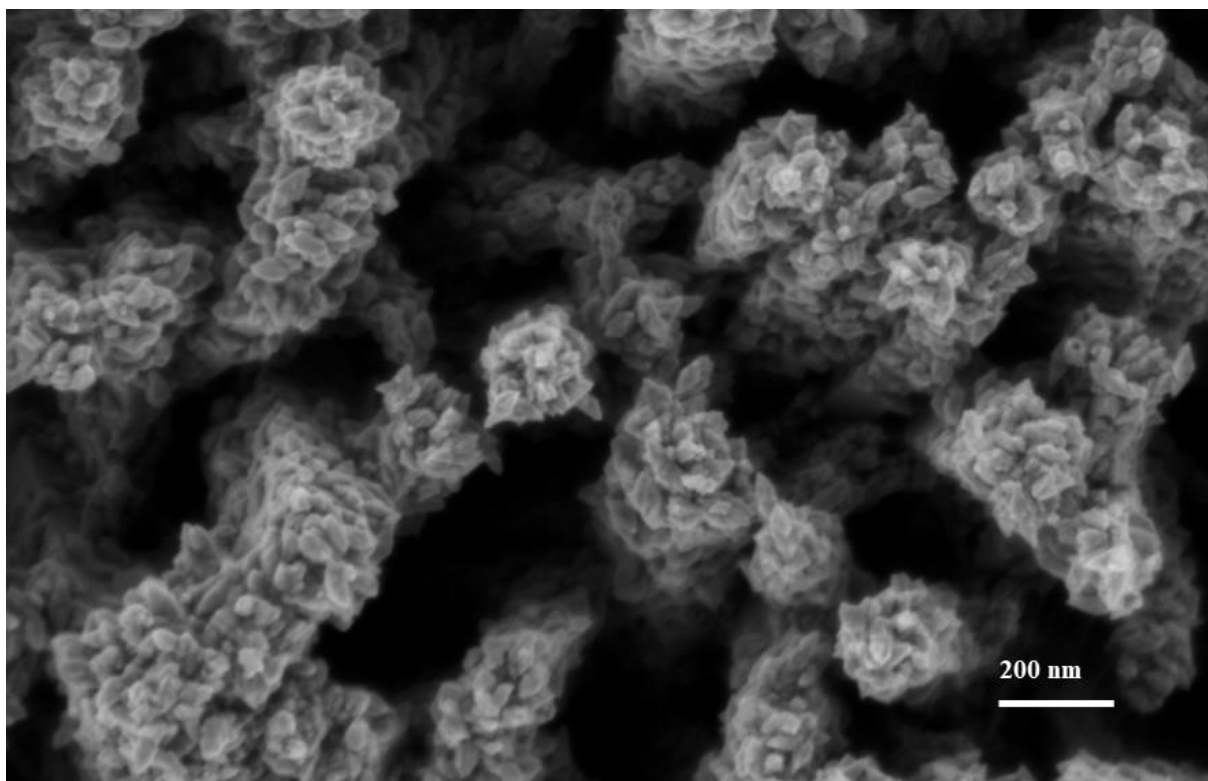

**Figure S4.** The FESEM image of nanorod arrays attached with rhombic sub-nano structures.

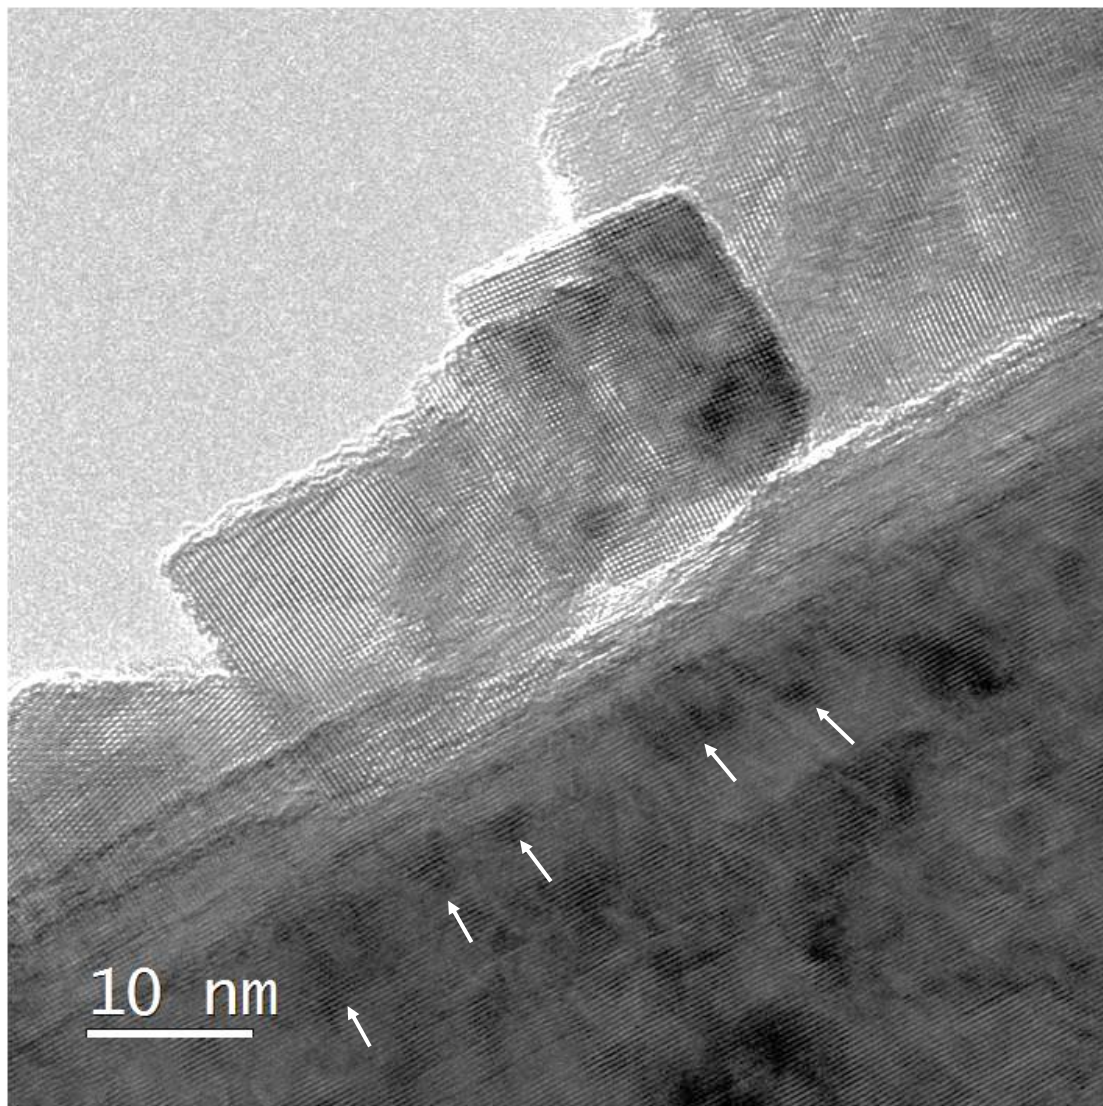

**Figure S5.** The lattice plane of the rutile nanorod was shifted by the attached sub-nano structures (white arrow indicated).

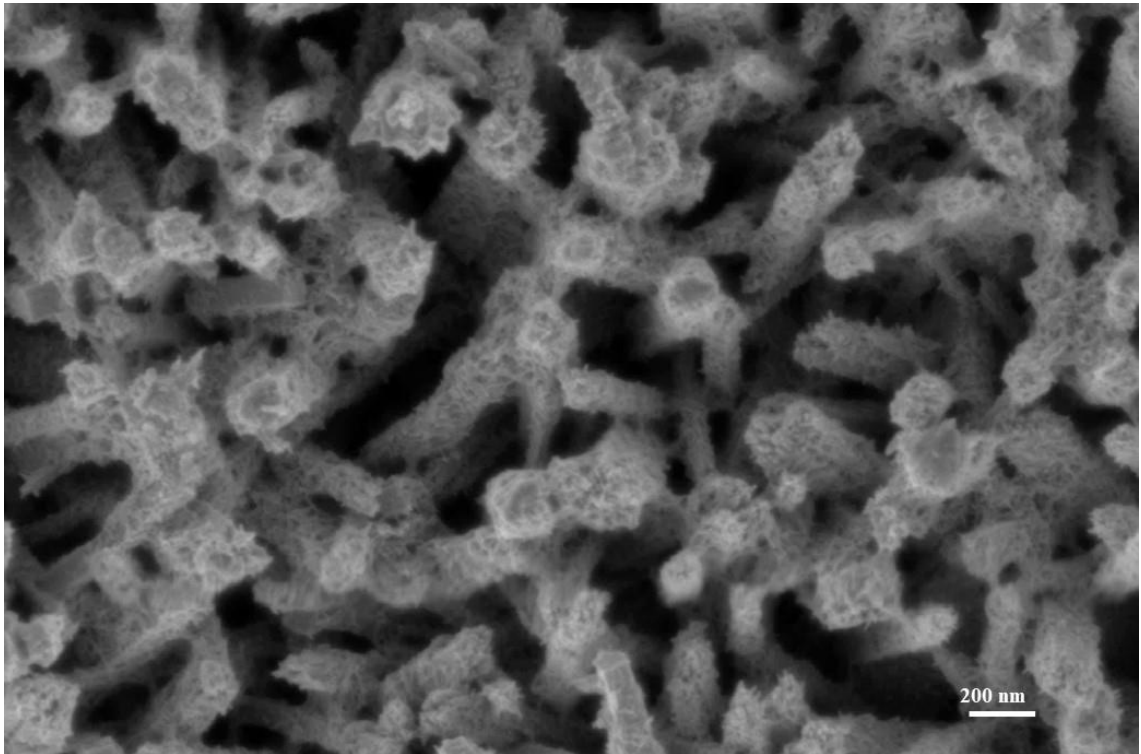

**Figure S6.** The FESEM image of nanorod arrays attached with spindle-like sub-nano structures.

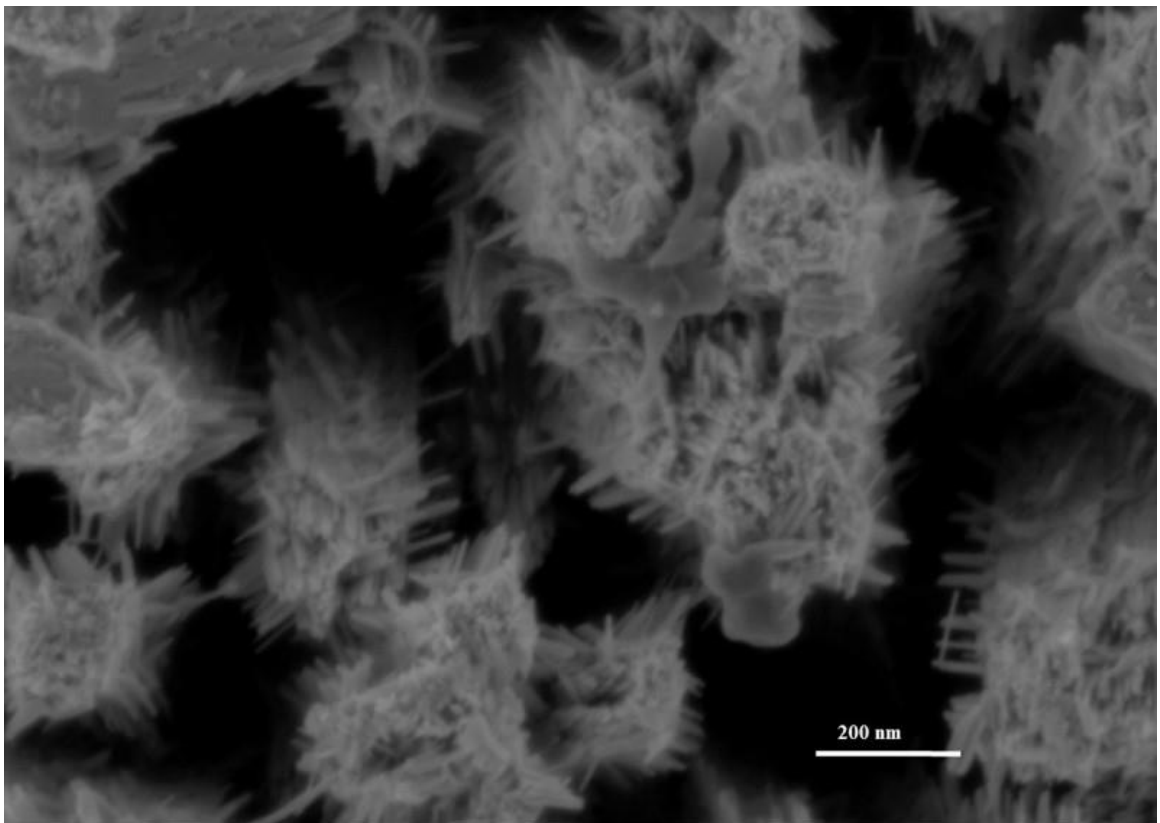

**Figure S7.** The FESEM image of nanorod arrays attached with rod-like sub-nano structures.

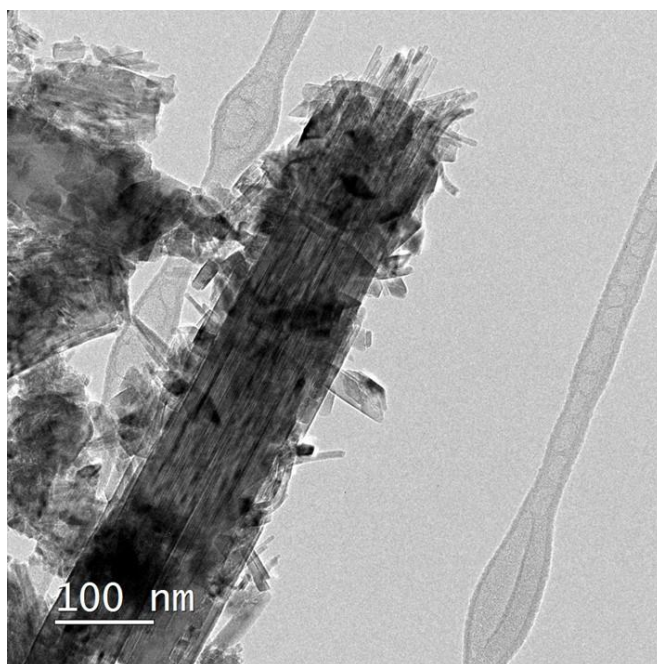

**Figure S8.** The TEM image of synthesis of HA\_TiO<sub>2</sub> without TiCl<sub>4</sub> aqueous solution pre-treatment.

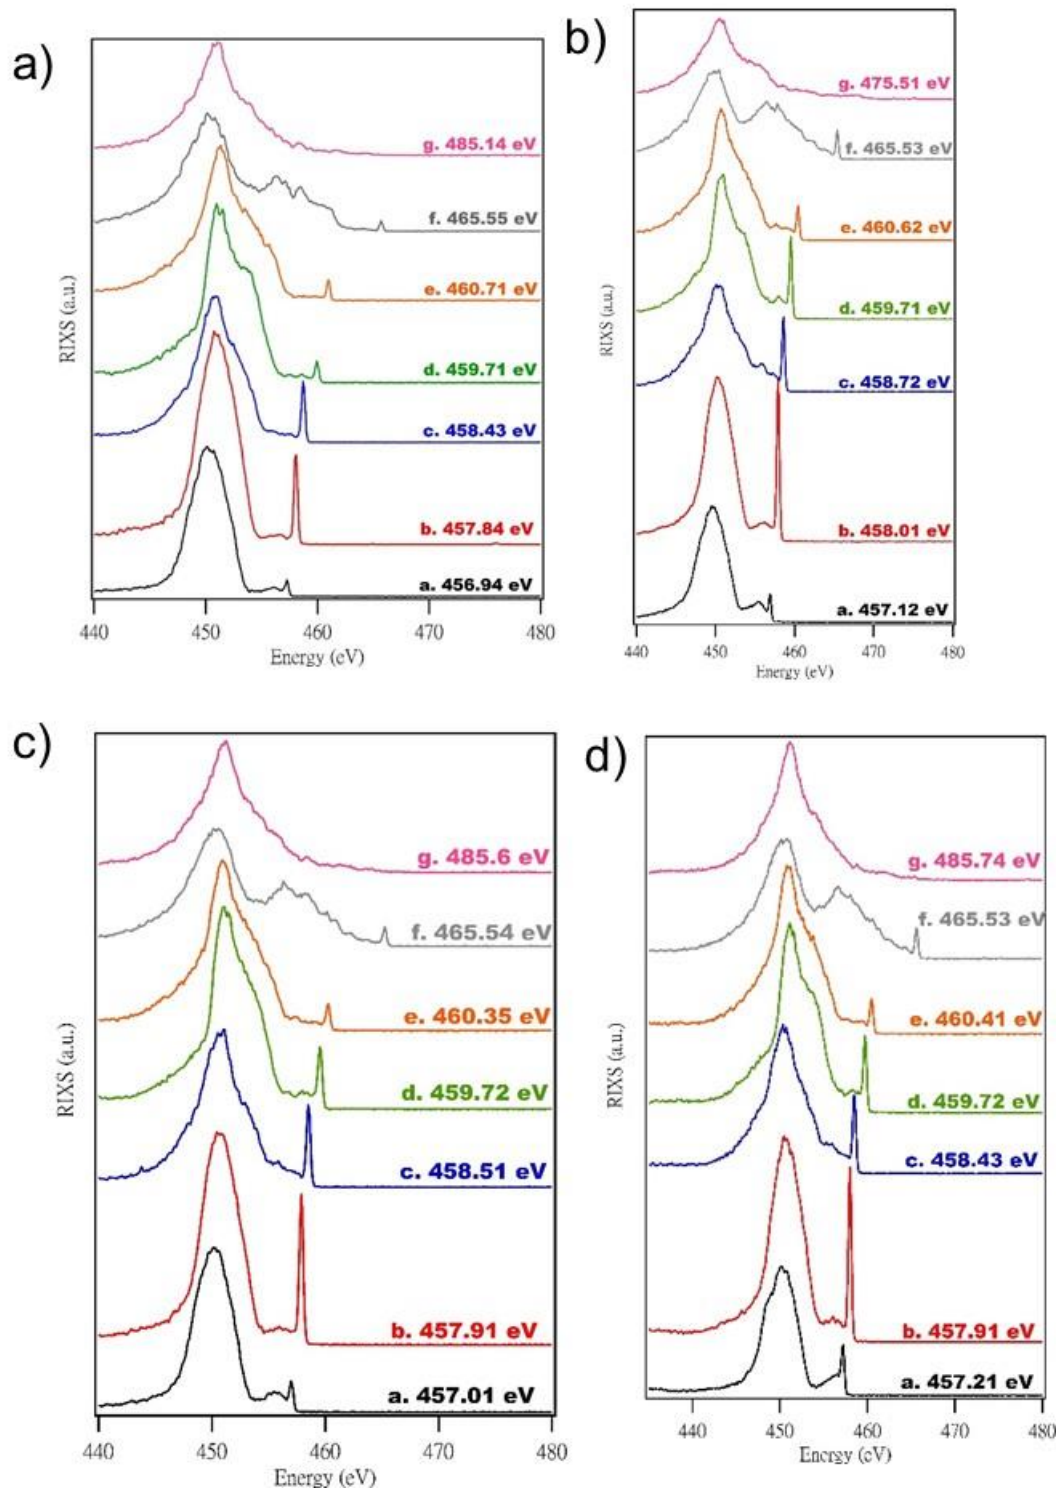

**Figure S9.** Ti 2p RIXS spectra of (a) TiO<sub>2</sub>\_R, (b) HA\_TiO<sub>2</sub>\_M, (c) HA\_TiO<sub>2</sub>\_A, and (d) HA\_TiO<sub>2</sub>\_D.



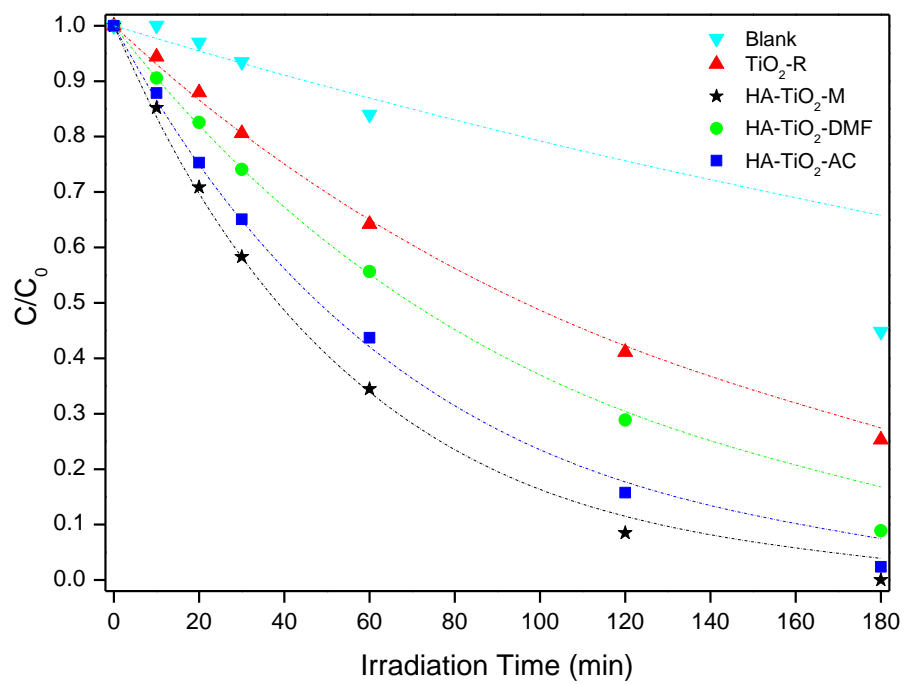

**Figure S10.** The UV-driven photocatalytic activity test with pseudo first-order rate model  $k_{obs}$ .
